# Supplementary material for: Ecomorphological inferences in early vertebrates: reconstructing Dunkleosteus terrelli (Arthrodira, Placodermi) caudal fin from palaeoecological data
Source: PubMed Central journal article supplement (PMC5723140; doi:10.7717/peerj.4081), 2017-12-06
Supplement: peerj-05-4081-s002.pdf [file peerj-05-4081-s002.pdf]

**Supplemental Data S2. Total Body Length (TBL) and Upper Jaw Perimeter (UJP) data  
of extant sharks considered in this study. Data taken from Lowry et al. (2009).**

| Species                        | TBL (cm) | UJP (cm) |
|--------------------------------|----------|----------|
| <i>Carcharodon carcharias</i>  | 227      | 40.1     |
| <i>Carcharodon carcharias</i>  | 262      | 41.7     |
| <i>Carcharodon carcharias</i>  | 182.5    | 26.2     |
| <i>Carcharodon carcharias</i>  | 170.2    | 30.1     |
| <i>Carcharodon carcharias</i>  | 124.5    | 22.4     |
| <i>Carcharodon carcharias</i>  | 243.8    | 41.8     |
| <i>Carcharodon carcharias</i>  | 379.1    | 60.3     |
| <i>Carcharodon carcharias</i>  | 154.9    | 25.4     |
| <i>Carcharodon carcharias</i>  | 523.2    | 99       |
| <i>Carcharodon carcharias</i>  | 563.2    | 96.7     |
| <i>Carcharodon carcharias</i>  | 487.7    | 80.5     |
| <i>Carcharodon carcharias</i>  | 237      | 38.5     |
| <i>Carcharodon carcharias</i>  | 281.9    | 46.5     |
| <i>Carcharodon carcharias</i>  | 134.6    | 23       |
| <i>Carcharodon carcharias</i>  | 535.9    | 90.5     |
| <i>Carcharodon carcharias</i>  | 594.4    | 89.2     |
| <i>Carcharodon carcharias</i>  | 457.2    | 79.8     |
| <i>Carcharodon carcharias</i>  | 473.7    | 91.5     |
| <i>Carcharodon carcharias</i>  | 553.7    | 85.5     |
| <i>Carcharodon carcharias</i>  | 166.37   | 26.3     |
| <i>Carcharhinus acronotus</i>  | 107      | 13.3     |
| <i>Carcharhinus acronotus</i>  | 111      | 12.9     |
| <i>Carcharhinus acronotus</i>  | 94.1     | 10.5     |
| <i>Carcharhinus acronotus</i>  | 117.6    | 13.8     |
| <i>Carcharhinus acronotus</i>  | 108      | 13.3     |
| <i>Carcharhinus acronotus</i>  | 120.4    | 13.9     |
| <i>Carcharhinus acronotus</i>  | 129      | 15.3     |
| <i>Carcharhinus acronotus</i>  | 129      | 15.1     |
| <i>Carcharhinus acronotus</i>  | 87.6     | 9.1      |
| <i>Carcharhinus acronotus</i>  | 116      | 13.3     |
| <i>Carcharhinus acronotus</i>  | 94       | 12.6     |
| <i>Carcharhinus acronotus</i>  | 120.6    | 13.8     |
| <i>Carcharhinus acronotus</i>  | 132      | 16.1     |
| <i>Carcharhinus acronotus</i>  | 101      | 11.5     |
| <i>Carcharhinus acronotus</i>  | 81.3     | 8.9      |
| <i>Carcharhinus acronotus</i>  | 88       | 10.9     |
| <i>Carcharhinus acronotus</i>  | 114.7    | 13.5     |
| <i>Carcharhinus acronotus</i>  | 76       | 8.5      |
| <i>Carcharhinus acronotus</i>  | 115      | 14.1     |
| <i>Carcharhinus acronotus</i>  | 116      | 13.4     |
| <i>Carcharhinus brevipinna</i> | 213      | 27.3     |

|                                 |       |      |
|---------------------------------|-------|------|
| <i>Carcharhinus brevipinna</i>  | 205   | 25.4 |
| <i>Carcharhinus brevipinna</i>  | 141   | 17.9 |
| <i>Carcharhinus brevipinna</i>  | 202   | 24   |
| <i>Carcharhinus brevipinna</i>  | 243.8 | 28.2 |
| <i>Carcharhinus brevipinna</i>  | 213   | 25.5 |
| <i>Carcharhinus brevipinna</i>  | 160   | 19.8 |
| <i>Carcharhinus brevipinna</i>  | 165   | 24.6 |
| <i>Carcharhinus brevipinna</i>  | 168   | 21.5 |
| <i>Carcharhinus brevipinna</i>  | 174   | 22.8 |
| <i>Carcharhinus brevipinna</i>  | 141   | 21.4 |
| <i>Carcharhinus brevipinna</i>  | 208   | 25.5 |
| <i>Carcharhinus falciformis</i> | 186   | 18.8 |
| <i>Carcharhinus falciformis</i> | 185   | 21.7 |
| <i>Carcharhinus falciformis</i> | 244   | 30.2 |
| <i>Carcharhinus falciformis</i> | 265   | 32   |
| <i>Carcharhinus falciformis</i> | 92    | 12   |
| <i>Carcharhinus falciformis</i> | 94    | 14.5 |
| <i>Carcharhinus falciformis</i> | 151   | 19.5 |
| <i>Carcharhinus falciformis</i> | 73.5  | 9.6  |
| <i>Carcharhinus falciformis</i> | 119   | 15.5 |
| <i>Carcharhinus falciformis</i> | 86.68 | 11.2 |
| <i>Carcharhinus leucas</i>      | 229   | 37   |
| <i>Carcharhinus leucas</i>      | 245   | 42.2 |
| <i>Carcharhinus leucas</i>      | 278   | 44.3 |
| <i>Carcharhinus leucas</i>      | 139.5 | 23.3 |
| <i>Carcharhinus leucas</i>      | 173.4 | 25.8 |
| <i>Carcharhinus leucas</i>      | 182   | 27.5 |
| <i>Carcharhinus leucas</i>      | 254.4 | 39.8 |
| <i>Carcharhinus leucas</i>      | 229.5 | 37.4 |
| <i>Carcharhinus leucas</i>      | 166.5 | 25   |
| <i>Carcharhinus leucas</i>      | 252   | 39.3 |
| <i>Carcharhinus leucas</i>      | 254   | 41   |
| <i>Carcharhinus leucas</i>      | 278   | 43.1 |
| <i>Carcharhinus leucas</i>      | 244   | 35.4 |
| <i>Carcharhinus leucas</i>      | 226   | 33.1 |
| <i>Carcharhinus leucas</i>      | 266.7 | 41.2 |
| <i>Carcharhinus leucas</i>      | 254   | 41   |
| <i>Carcharhinus leucas</i>      | 214   | 28.6 |
| <i>Carcharhinus leucas</i>      | 284.5 | 44.2 |
| <i>Carcharhinus leucas</i>      | 190.5 | 30   |
| <i>Carcharhinus leucas</i>      | 222   | 33.6 |
| <i>Carcharhinus leucas</i>      | 278   | 43   |
| <i>Carcharhinus leucas</i>      | 138   | 19.9 |
| <i>Carcharhinus limbatus</i>    | 181.4 | 25.5 |
| <i>Carcharhinus limbatus</i>    | 171   | 26.7 |
| <i>Carcharhinus limbatus</i>    | 165   | 26.4 |

|                              |        |      |
|------------------------------|--------|------|
| <i>Carcharhinus limbatus</i> | 193.5  | 28.5 |
| <i>Carcharhinus limbatus</i> | 78     | 12.3 |
| <i>Carcharhinus limbatus</i> | 158.5  | 27.2 |
| <i>Carcharhinus limbatus</i> | 128.5  | 18.6 |
| <i>Carcharhinus limbatus</i> | 176    | 26.1 |
| <i>Carcharhinus limbatus</i> | 169    | 24   |
| <i>Carcharhinus limbatus</i> | 177.8  | 26.8 |
| <i>Carcharhinus limbatus</i> | 150    | 24.1 |
| <i>Carcharhinus limbatus</i> | 201.9  | 26.6 |
| <i>Carcharhinus limbatus</i> | 170    | 27.3 |
| <i>Carcharhinus limbatus</i> | 176.5  | 26.8 |
| <i>Carcharhinus limbatus</i> | 124    | 19.5 |
| <i>Carcharhinus limbatus</i> | 150    | 21.5 |
| <i>Carcharhinus limbatus</i> | 185.4  | 26.2 |
| <i>Carcharhinus limbatus</i> | 193    | 28   |
| <i>Carcharhinus limbatus</i> | 115    | 18   |
| <i>Carcharhinus limbatus</i> | 136    | 22.1 |
| <i>Carcharhinus obscurus</i> | 320    | 45.1 |
| <i>Carcharhinus obscurus</i> | 300.9  | 45.7 |
| <i>Carcharhinus obscurus</i> | 313    | 45.9 |
| <i>Carcharhinus obscurus</i> | 307    | 40.2 |
| <i>Carcharhinus obscurus</i> | 295    | 38.1 |
| <i>Carcharhinus obscurus</i> | 153    | 21.2 |
| <i>Carcharhinus obscurus</i> | 229    | 28.3 |
| <i>Carcharhinus obscurus</i> | 334    | 41.2 |
| <i>Carcharhinus obscurus</i> | 320    | 40.7 |
| <i>Carcharhinus obscurus</i> | 256.5  | 34.2 |
| <i>Carcharhinus obscurus</i> | 320    | 44.6 |
| <i>Carcharhinus obscurus</i> | 294    | 38.5 |
| <i>Carcharhinus obscurus</i> | 323.9  | 43.4 |
| <i>Carcharhinus obscurus</i> | 182.9  | 26.3 |
| <i>Carcharhinus obscurus</i> | 340.4  | 46.5 |
| <i>Carcharhinus obscurus</i> | 386.1  | 46.3 |
| <i>Carcharhinus obscurus</i> | 310    | 41.5 |
| <i>Carcharhinus plumbeus</i> | 182    | 27.3 |
| <i>Carcharhinus plumbeus</i> | 182    | 25.6 |
| <i>Carcharhinus plumbeus</i> | 165    | 23.7 |
| <i>Carcharhinus plumbeus</i> | 212    | 27.3 |
| <i>Carcharhinus plumbeus</i> | 182    | 27.3 |
| <i>Carcharhinus plumbeus</i> | 186    | 22.1 |
| <i>Carcharhinus plumbeus</i> | 95.6   | 11.5 |
| <i>Carcharhinus plumbeus</i> | 86.8   | 11   |
| <i>Carcharhinus plumbeus</i> | 202    | 28   |
| <i>Carcharhinus plumbeus</i> | 198.12 | 28.3 |
| <i>Carcharhinus plumbeus</i> | 165.1  | 25.1 |
| <i>Carcharhinus plumbeus</i> | 185    | 27.8 |

|                              |        |      |
|------------------------------|--------|------|
| <i>Carcharhinus plumbeus</i> | 208    | 29.6 |
| <i>Carcharhinus plumbeus</i> | 196    | 28.2 |
| <i>Carcharhinus plumbeus</i> | 167    | 23.9 |
| <i>Carcharhinus plumbeus</i> | 191    | 28.4 |
| <i>Carcharhinus plumbeus</i> | 192    | 26.9 |
| <i>Carcharhinus plumbeus</i> | 194    | 29.3 |
| <i>Carcharhinus plumbeus</i> | 181    | 30.7 |
| <i>Carcharhinus plumbeus</i> | 153    | 25.4 |
| <i>Carcharhinus plumbeus</i> | 182    | 26.2 |
| <i>Carcharhinus plumbeus</i> | 166    | 24   |
| <i>Carcharhinus plumbeus</i> | 183    | 29.5 |
| <i>Isurus paucus</i>         | 156.4  | 27.8 |
| <i>Isurus paucus</i>         | 220    | 35.2 |
| <i>Isurus paucus</i>         | 265.1  | 46.7 |
| <i>Isurus paucus</i>         | 426.7  | 72.2 |
| <i>Isurus paucus</i>         | 126.1  | 23.1 |
| <i>Isurus paucus</i>         | 272    | 45.3 |
| <i>Isurus paucus</i>         | 384.81 | 64.5 |
| <i>Isurus paucus</i>         | 228.6  | 39.4 |
| <i>Isurus paucus</i>         | 242    | 43.4 |
| <i>Isurus paucus</i>         | 251.46 | 43.8 |
| <i>Isurus paucus</i>         | 320    | 57.3 |
| <i>Isurus paucus</i>         | 220.98 | 37   |
| <i>Isurus paucus</i>         | 224.16 | 37.7 |
| <i>Isurus paucus</i>         | 285.75 | 50.5 |
| <i>Isurus paucus</i>         | 243.84 | 42   |
| <i>Isurus paucus</i>         | 262.89 | 42.3 |
| <i>Isurus paucus</i>         | 205.7  | 36.5 |
| <i>Isurus paucus</i>         | 254    | 43.2 |
| <i>Isurus paucus</i>         | 248.48 | 47.3 |
| <i>Isurus oxyrinchus</i>     | 259.1  | 47.2 |
| <i>Isurus oxyrinchus</i>     | 251    | 50   |
| <i>Isurus oxyrinchus</i>     | 198.12 | 33.9 |
| <i>Isurus oxyrinchus</i>     | 264.16 | 44.5 |
| <i>Isurus oxyrinchus</i>     | 239.4  | 41.3 |
| <i>Isurus oxyrinchus</i>     | 303.53 | 54.3 |
| <i>Isurus oxyrinchus</i>     | 320.04 | 56.8 |
| <i>Isurus oxyrinchus</i>     | 320    | 58   |
| <i>Isurus oxyrinchus</i>     | 276.86 | 51   |
| <i>Isurus oxyrinchus</i>     | 254    | 41   |
| <i>Isurus oxyrinchus</i>     | 228.6  | 43.2 |
| <i>Isurus oxyrinchus</i>     | 259.1  | 45.7 |
| <i>Isurus oxyrinchus</i>     | 259    | 47.1 |
| <i>Isurus oxyrinchus</i>     | 251.5  | 46   |
| <i>Isurus oxyrinchus</i>     | 254    | 43.2 |
| <i>Isurus oxyrinchus</i>     | 274.3  | 47.2 |

|                               |        |      |
|-------------------------------|--------|------|
| <i>Isurus oxyrinchus</i>      | 264.16 | 49   |
| <i>Isurus oxyrinchus</i>      | 190.5  | 33.5 |
| <i>Isurus oxyrinchus</i>      | 177    | 31.8 |
| <i>Isurus oxyrinchus</i>      | 136    | 23.9 |
| <i>Isurus oxyrinchus</i>      | 163    | 28   |
| <i>Isurus oxyrinchus</i>      | 181    | 35.1 |
| <i>Isurus oxyrinchus</i>      | 246    | 45.5 |
| <i>Negaprion brevirostris</i> | 170    | 28.3 |
| <i>Negaprion brevirostris</i> | 260    | 37.8 |
| <i>Negaprion brevirostris</i> | 243    | 34.7 |
| <i>Negaprion brevirostris</i> | 116    | 18.6 |
| <i>Negaprion brevirostris</i> | 268    | 40.6 |
| <i>Negaprion brevirostris</i> | 232    | 39.5 |
| <i>Negaprion brevirostris</i> | 240    | 35   |
| <i>Negaprion brevirostris</i> | 198    | 30.6 |
| <i>Negaprion brevirostris</i> | 68.5   | 10.3 |
| <i>Negaprion brevirostris</i> | 213.4  | 39.7 |
| <i>Galeocerdo cuvier</i>      | 327    | 54   |
| <i>Galeocerdo cuvier</i>      | 71.12  | 10.3 |
| <i>Galeocerdo cuvier</i>      | 212.3  | 26.4 |
| <i>Galeocerdo cuvier</i>      | 235    | 30.6 |
| <i>Galeocerdo cuvier</i>      | 335    | 41   |
| <i>Galeocerdo cuvier</i>      | 218.3  | 27.7 |
| <i>Galeocerdo cuvier</i>      | 300    | 43   |
| <i>Galeocerdo cuvier</i>      | 78.8   | 9.8  |
| <i>Galeocerdo cuvier</i>      | 219    | 27.9 |
| <i>Galeocerdo cuvier</i>      | 185    | 25.2 |
| <i>Galeocerdo cuvier</i>      | 337.72 | 51.2 |
| <i>Galeocerdo cuvier</i>      | 378.46 | 52.6 |
| <i>Galeocerdo cuvier</i>      | 358.14 | 49.7 |
| <i>Galeocerdo cuvier</i>      | 208.28 | 29   |
| <i>Galeocerdo cuvier</i>      | 186.7  | 22.1 |
| <i>Galeocerdo cuvier</i>      | 151    | 19   |
| <i>Galeocerdo cuvier</i>      | 182    | 24.3 |
| <i>Galeocerdo cuvier</i>      | 95     | 11.2 |
| <i>Galeocerdo cuvier</i>      | 138    | 17.5 |
| <i>Galeocerdo cuvier</i>      | 358.14 | 51.9 |
| <i>Galeocerdo cuvier</i>      | 136    | 17.7 |
| <i>Galeocerdo cuvier</i>      | 332    | 52.1 |
| <i>Sphyrna lewini</i>         | 246.4  | 23.5 |
| <i>Sphyrna lewini</i>         | 277.5  | 26.5 |
| <i>Sphyrna lewini</i>         | 230.5  | 21.8 |
| <i>Sphyrna lewini</i>         | 277    | 26.4 |
| <i>Sphyrna lewini</i>         | 326    | 29.8 |
| <i>Sphyrna lewini</i>         | 100    | 10.6 |
| <i>Sphyrna lewini</i>         | 161    | 15.8 |

|                         |     |      |
|-------------------------|-----|------|
| <i>Sphyrna lewini</i>   | 205 | 20.7 |
| <i>Sphyrna lewini</i>   | 165 | 16.8 |
| <i>Sphyrna lewini</i>   | 250 | 23.5 |
| <i>Sphyrna lewini</i>   | 167 | 16.4 |
| <i>Sphyrna lewini</i>   | 258 | 24.4 |
| <i>Sphyrna lewini</i>   | 301 | 27.6 |
| <i>Sphyrna lewini</i>   | 127 | 13.2 |
| <i>Sphyrna mokarran</i> | 414 | 58.2 |
| <i>Sphyrna mokarran</i> | 208 | 24.5 |
| <i>Sphyrna mokarran</i> | 350 | 41   |
| <i>Sphyrna mokarran</i> | 205 | 22.7 |
| <i>Sphyrna mokarran</i> | 314 | 36.6 |
| <i>Sphyrna mokarran</i> | 257 | 28.4 |
| <i>Sphyrna mokarran</i> | 246 | 25   |
| <i>Sphyrna mokarran</i> | 298 | 32.9 |
| <i>Sphyrna mokarran</i> | 319 | 36.5 |
| <i>Sphyrna mokarran</i> | 255 | 27.8 |
| <i>Sphyrna mokarran</i> | 302 | 31.2 |
| <i>Sphyrna mokarran</i> | 300 | 40.5 |
| <i>Sphyrna mokarran</i> | 365 | 29.5 |
