# Supplementary material for: Ecomorphological inferences in early vertebrates: reconstructing Dunkleosteus terrelli (Arthrodira, Placodermi) caudal fin from palaeoecological data
Source: PubMed Central journal article supplement (PMC5723140; doi:10.7717/peerj.4081), 2017-12-06

Supplemental Data S3. GPA (left) and RFTRA (right) superimpositions for the whole group of sharks and for each ecological subgroup. Points denote landmarks and crosses denote landmark centroids.

**Total**

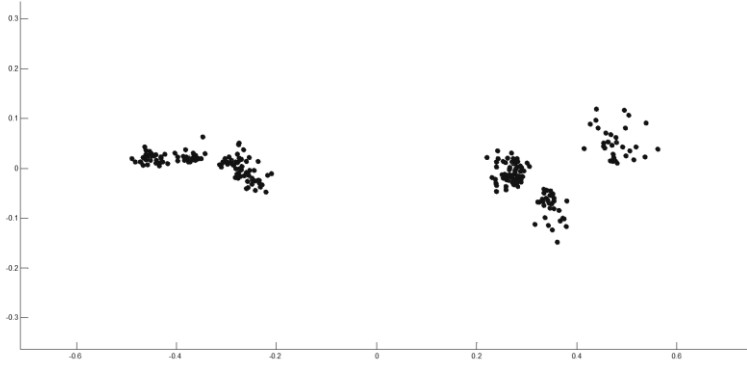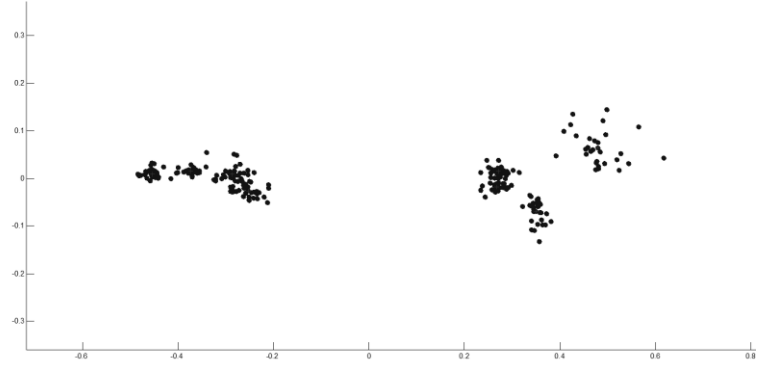

**Demersal sharks**

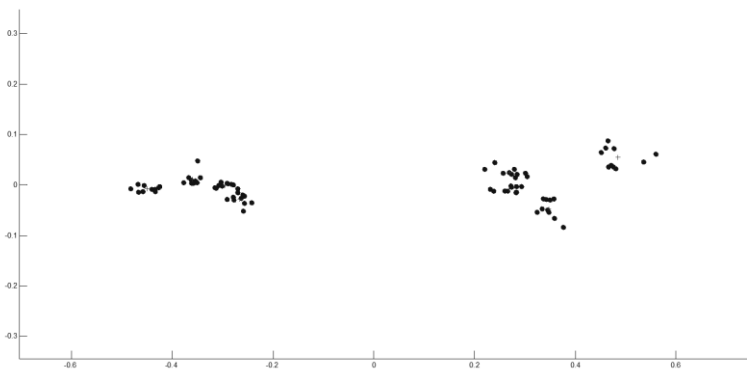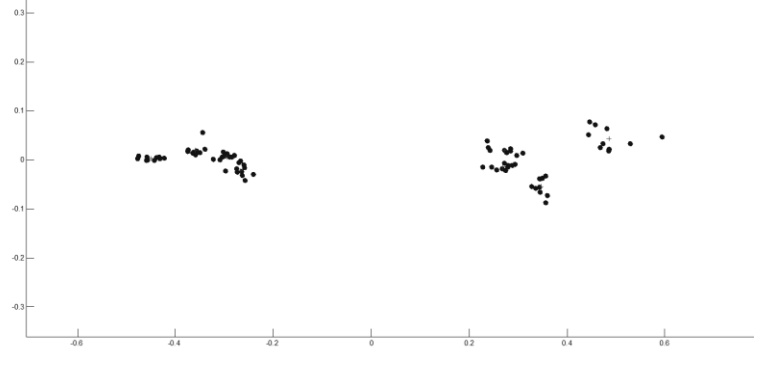

**Squalomorph sharks**

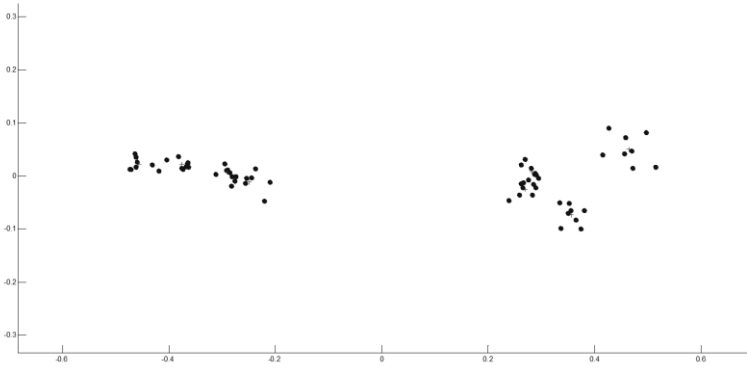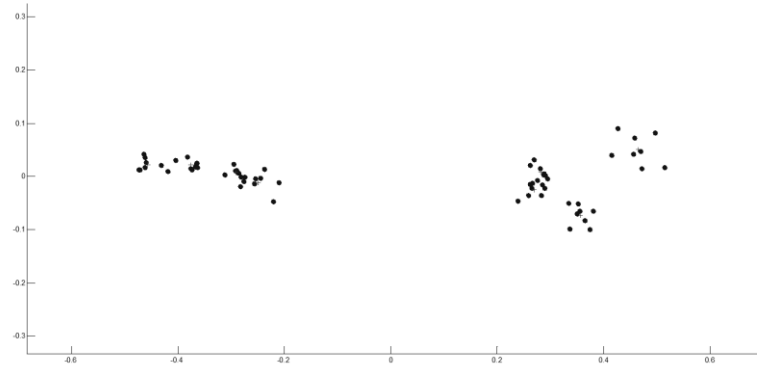

**Active pelagic sharks**

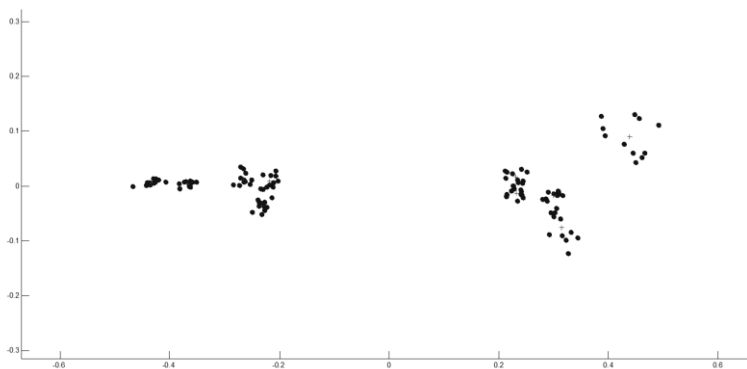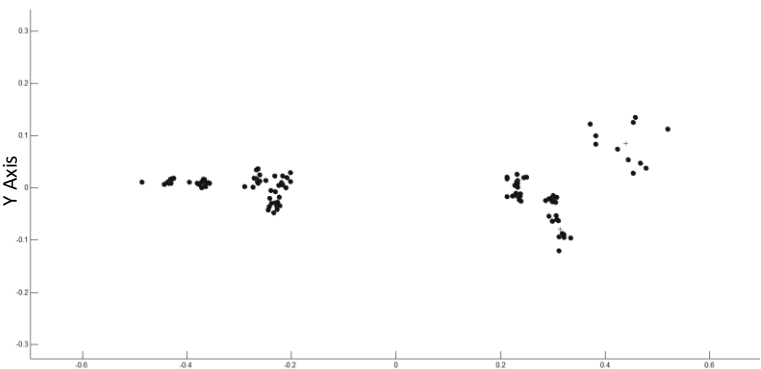

Supplement: peerj-05-4081-s003.pdf [file peerj-05-4081-s003.pdf]
